# Supplementary material
Source: Research Square preprint supplement (doi:10.21203/rs.3.rs-9258699/v1)
Supplement: Supplementary file 1 [file c831c323fc439aef9ab64019.pdf]

**Title: Site-specific bio-efficacy of Interceptor G2 and Royal Guard against highly pyrethroid-resistant *Anopheles gambiae* s.l. in experimental hut in southwestern Burkina Faso.**

**SUPPLEMENTARY TABLES**

**Supplementary Table 1:** Number of *An. gambiae* s.l. collected during the trial, found blood-fed, exiting, dead within seventy-two hours post collection and followed up, displayed by treatment and sites.

| Site              | Treatment | Dead_24h | Cum_dead_72h | Blood fed | Number exiting | Number followed up | Number collected |
|-------------------|-----------|----------|--------------|-----------|----------------|--------------------|------------------|
| Tengrela          | IG1_aged  | 134      | 224          | 382       | 237            | 1011               | 1166             |
|                   | IG1_unw   | 119      | 165          | 336       | 196            | 958                | 1098             |
|                   | IG2_aged  | 225      | 346          | 679       | 364            | 1552               | 1845             |
|                   | IG2_unw   | 573      | 670          | 590       | 392            | 1430               | 1880             |
|                   | IG2_w     | 195      | 220          | 511       | 190            | 937                | 1090             |
|                   | RG_unw    | 111      | 120          | 220       | 122            | 412                | 557              |
|                   | RG_w      | 62       | 65           | 223       | 72             | 345                | 451              |
|                   | UT        | 199      | 263          | 1428      | 525            | 2636               | 3004             |
| Total in Tengrela |           | 1618     | 2073         | 4369      | 2098           | 9281               | 11091            |
| Tiefora           | IG1_aged  | 33       | 88           | 255       | 76             | 391                | 424              |
|                   | IG1_unw   | 77       | 115          | 184       | 119            | 356                | 431              |
|                   | IG2_aged  | 76       | 146          | 218       | 92             | 367                | 443              |
|                   | IG2_unw   | 192      | 263          | 253       | 137            | 330                | 475              |
|                   | IG2_w     | 124      | 143          | 197       | 62             | 212                | 298              |
|                   | RG_unw    | 63       | 75           | 117       | 60             | 211                | 262              |
|                   | RG_w      | 33       | 57           | 30        | 100            | 256                | 278              |
|                   | UT        | 93       | 114          | 578       | 202            | 999                | 1098             |
| Total in Tiefora  |           | 691      | 1001         | 1832      | 848            | 3122               | 3709             |
| Total             |           | 2309     | 3074         | 6201      | 2946           | 12403              | 14800            |

UT = untreated net, IG1\_unw = unwashed Interceptor G1 nets, IG1\_w = washed Interceptor G1 nets; IG2\_unw = unwashed Interceptor G2 nets, IG2\_w = washed Interceptor G2 nets; IG2\_aged= aged Interceptor G2 nets; RG\_unw = unwashed Royal Guard nets. RG\_w = washed nets Royal Guard nets. Cum\_dead\_72h indicates the cumulative number of dead *An. gambiae* s.l. within 72 hours post collection and Dead\_24h indicates the count of dead within 24 h post collection.

**Supplementary Table 2:** Comparative Odds Ratio of deterrence by contrasting treatment and sites. Estimates are derived from the generalised linear mixed effect model.

| Treatment | Sites    | ITNs vs UT         |         | ITNs vs unwashed IG1 |         | ITNs vs unwashed ITNs |         | IG2_aged vs IG2_w  |         |
|-----------|----------|--------------------|---------|----------------------|---------|-----------------------|---------|--------------------|---------|
|           |          | Odds.ratio [95%CI] | P-value | Odds.ratio [95%CI]   | P-value | Odds.ratio [95%CI]    | P-value | Odds.ratio [95%CI] | P-value |
| IG1_aged  | Tengrela | 0.94 [0.72–1.24]   | 0.96    | 1.02 [0.74–1.41]     | 1.00    | –                     | –       | –                  | –       |
| IG1_unw   | Tengrela | 0.93 [0.70–1.22]   | 0.92    | –                    | –       | –                     | –       | –                  | –       |
| IG2_aged  | Tengrela | 1.42 [1.08–1.87]   | 0.01*   | 1.53 [1.12–2.11]     | 0.001*  | 1.34 [1.0–1.81]       | 0.05    | 1.45 [1.03–2.05]   | 0.03*   |
| IG2_unw   | Tengrela | 1.05 [0.83–1.33]   | 0.96    | 1.14 [0.85–1.53]     | 0.72    | –                     | –       | –                  | –       |
| IG2_w     | Tengrela | 0.98 [0.74–1.29]   | 1.00    | 1.06 [0.76–1.48]     | 0.98    | 0.93 [0.7–1.25]       | 0.95    | –                  | –       |
| RG_unw    | Tengrela | 1.11 [0.77–1.61]   | 0.90    | 1.2 [0.80–1.80]      | 0.69    | –                     | –       | –                  | –       |
| RG_w      | Tengrela | 0.61 [0.42–0.90]   | 0.01*   | 0.66 [0.43–1.02]     | 0.07    | 0.55 [0.34–0.9]       | 0.01*   | –                  | –       |
| IG1_aged  | Tiefora  | 0.72 [0.53–0.97]   | 0.02*   | 1.08 [0.76–1.52]     | 0.96    | –                     | –       | –                  | –       |
| IG1_unw   | Tiefora  | 0.67 [0.50–0.89]   | 0.001*  | –                    | –       | –                     | –       | –                  | –       |
| IG2_aged  | Tiefora  | 0.6 [0.45–0.81]    | 0.001*  | 0.91 [0.65–1.27]     | 0.91    | 0.80 [0.58–1.12]      | 0.37    | 0.57 [0.37–0.88]   | 0.005*  |
| IG2_unw   | Tiefora  | 0.75 [0.56–1.01]   | 0.06    | 1.13 [0.81–1.57]     | 0.83    | –                     | –       | –                  | –       |
| IG2_w     | Tiefora  | 1.07 [0.72–1.58]   | 0.98    | 1.6 [1.05–2.44]      | 0.02    | 1.41 [0.93–2.15]      | 0.14    | –                  | –       |
| RG_unw    | Tiefora  | 0.91 [0.61–1.35]   | 0.94    | 1.36 [0.89–2.09]     | 0.27    | –                     | –       | –                  | –       |
| RG_w      | Tiefora  | 1.21 [0.82–1.79]   | 0.65    | 1.82 [1.16–2.84]     | 0.001*  | 1.34 [0.8–2.25]       | 0.53    | –                  | –       |

ITNs = insecticide treated nets, UT = untreated net, IG1\_unw = unwashed Interceptor G1 nets, IG1\_w = washed Interceptor G1 nets; IG2\_unw = unwashed Interceptor G2 nets, IG2\_w = washed Interceptor G2 nets; IG2\_aged= aged Interceptor G2 nets; RG\_unw = unwashed Royal Guard nets. RG\_w = washed Royal Guard nets. CI= Confidence intervals with \* denoting P value < 0.05.

**Supplementary Table 3:** Exophily rates and comparative Odds Ratio by contrasting treatment and sites. Estimates are derived from the generalised linear mixed effect model.

| Treatment | Sites    | Exophily rate [95%CI] | ITNs vs UT         |         | ITNs vs unwashed IG1 |         | ITNs vs unwashed ITNs |         | IG2_aged vs IG2_w  |         |
|-----------|----------|-----------------------|--------------------|---------|----------------------|---------|-----------------------|---------|--------------------|---------|
|           |          |                       | Odds.ratio [95%CI] | P-value | Odds.ratio [95%CI]   | P-value | Odds.ratio [95%CI]    | P-value | Odds.ratio [95%CI] | P-value |
| UT        | Tengrela | 12.46 [10.39– 14.88]  | –                  | –       | –                    | –       | –                     | –       | –                  | –       |
| IG1_aged  | Tengrela | 16.38 [12.61– 21]     | 1.38 [0.84– 2.24]  | 0.37    | 1.05 [0.58–1.9]      | 1.00    | –                     | –       | –                  | –       |
| IG1_unw   | Tengrela | 15.7 [11.93– 20.39]   | 1.31 [0.79– 2.17]  | 0.56    | –                    | –       | –                     | –       | –                  | –       |
| IG2_aged  | Tengrela | 15.55 [12.1– 19.76]   | 1.29 [0.81– 2.08]  | 0.54    | 0.99 [0.56–1.76]     | 1.00    | 1.13 [0.67– 1.90]     | 0.95    | 1.19 [0.67– 2.12]  | 0.9     |
| IG2_unw   | Tengrela | 13.98 [11.15– 17.39]  | 1.14 [0.74– 1.77]  | 0.89    | 0.87 [0.51–1.51]     | 0.94    | –                     | –       | –                  | –       |
| IG2_w     | Tengrela | 13.43 [10.11– 17.63]  | 1.09 [0.66– 1.81]  | 0.98    | 0.83 [0.46–1.52]     | 0.90    | 0.95 [0.55– 1.65]     | 1.00    | –                  | –       |
| RG_unw    | Tengrela | 17.76 [12.13– 25.27]  | 1.52 [0.79– 2.93]  | 0.39    | 1.16 [0.56–2.42]     | 0.97    | –                     | –       | –                  | –       |
| RG_w      | Tengrela | 11.69 [7.43– 17.92]   | 0.93 [0.45– 1.91]  | 1.00    | 0.71 [0.32–1.57]     | 0.73    | 0.61 [0.24– 1.50]     | 0.54    | –                  | –       |
| UT        | Tiefora  | 13.7 [10.79– 17.24]   | –                  | –       | –                    | –       | –                     | –       | –                  | –       |
| IG1_aged  | Tiefora  | 13.13 [9.15– 18.51]   | 0.95 [0.5– 1.82]   | 1.00    | 0.45 [0.22–0.93]     | 0.02*   | –                     | –       | –                  | –       |
| IG1_unw   | Tiefora  | 25.25 [18.98– 32.74]  | 2.13 [1.16– 3.91]  | 0.007*  | –                    | –       | –                     | –       | –                  | –       |
| IG2_aged  | Tiefora  | 15.38 [11.1– 20.91]   | 1.14 [0.62– 2.11]  | 0.96    | 0.54 [0.27–1.08]     | 0.11    | 0.61 [0.30– 1.23]     | 0.29    | 0.92 [0.38– 2.26]  | 0.99    |
| IG2_unw   | Tiefora  | 22.88 [17.03– 30.01]  | 1.87 [1.02– 3.43]  | 0.04*   | 0.88 [0.44–1.76]     | 0.98    | –                     | –       | –                  | –       |
| IG2_w     | Tiefora  | 16.42 [10.16– 25.46]  | 1.24 [0.54– 2.82]  | 0.93    | 0.58 [0.24–1.41]     | 0.43    | 0.66 [0.27– 1.60]     | 0.68    | –                  | –       |
| RG_unw    | Tiefora  | 18.17 [11.29– 27.91]  | 1.4 [0.61– 3.19]   | 0.77    | 0.66 [0.27–1.6]      | 0.67    | –                     | –       | –                  | –       |
| RG_w      | Tiefora  | 28.47 [19.72– 39.22]  | 2.51 [1.2– 5.25]   | 0.006*  | 1.18 [0.52–2.65]     | 0.97    | 1.79 [0.67– 4.80]     | 0.46    | –                  | –       |

ITNs = insecticide treated nets, UT = untreated net, IG1\_unw = unwashed Interceptor G1 nets, IG1\_w = washed Interceptor G1 nets; IG2\_unw = unwashed Interceptor G2 nets, IG2\_w = washed Interceptor G2 nets; IG2\_aged= aged Interceptor G2 nets; RG\_unw = unwashed Royal Guard nets. RG\_w = washed Royal Guard nets. CI = Confidence intervals with \* denoting P-value < 0.05.

**Supplementary Table 4:** The study arms and the characteristics of the nets as decided by the manufacturer and their provenance. NMCP: National malaria control programme

| Treatment                                            | Abbreviation | Active ingredient                                                                   | Fabric type                                      |
|------------------------------------------------------|--------------|-------------------------------------------------------------------------------------|--------------------------------------------------|
| Untreated net                                        | UT           | None                                                                                | Polyester (100 denier) local market              |
| Interceptor G1 unwashed (BASF)                       | IG1_unw      | Alpha-cypermethrin at 200 mg/m <sup>2</sup>                                         | Polyester (100 denier)-NMCP                      |
| Interceptor G1 aged (BASF)                           | IG1_aged     |                                                                                     |                                                  |
| Interceptor G2 unwashed (BASF)                       | IG2_unw      | Alpha-cypermethrin at 100 mg/m <sup>2</sup> + Chlorfenapyr at 200 mg/m <sup>2</sup> | Polyester (100 denier)-NMCP distribution         |
| Interceptor G2 20X washed (BASF)                     | IG2_w        |                                                                                     | Polyester (100 denier)                           |
| Interceptor G2 aged/used (BASF)                      | RG_aged      |                                                                                     | Polyester (100 denier)-NMCP<br>Two years of aged |
| Royal Gard unwashed (Disease Control Technologies)   | RG_unw       | Alpha-cypermethrin at 5.83 g/kg + Pyriproxyfen at 5.54 g/kg                         | Polyethylene (150 denier) RCT-Tanzania           |
| Royal Gard 20X washed (Disease Control Technologies) | RG_w         |                                                                                     |                                                  |

**Supplementary Table 5:** Experimental treatments and yearly application record for each round

| Treatment/<br>years | Round 1 |      |      | Round 2 |      |      |
|---------------------|---------|------|------|---------|------|------|
|                     | 2019    | 2020 | 2021 | 2019    | 2020 | 2021 |
| UT                  | x       | x    | x    | NC      | x    | x    |
| IG1_aged            | NC      | NC   | x    | NC      | NC   | x    |
| IG1_unw             | NC      | x    | x    | NC      | NC   | NC   |
| IG2_aged            | NC      | NC   | x    | NC      | NC   | NC   |
| IG2_unw             | x       | x    | x    | NC      | NC   | NC   |
| IG2_w               | x       | x    | NC   | NC      | NC   | NC   |
| RG_unw              | NC      | x    | NC   | NC      | NC   | NC   |
| RG_w                | NC      | NC   | NC   | NC      | x    | NC   |

UT = untreated net, IG1\_unw = unwashed Interceptor G1 nets, IG1\_w = washed Interceptor G1 nets; IG2\_unw = unwashed Interceptor G2 nets, IG2\_w = washed Interceptor G2 nets; IG2\_aged = aged Interceptor G2 nets; RG\_unw = unwashed Royal Guard nets. RG\_w = washed Royal Guard nets. X = net used for collection and NC indicates this net was not used for collection during that trial.
